# Supplementary material for: Evaluation of Algorithms for Intracranial EEG (iEEG) Source Imaging of Extended Sources: Feasibility of Using iEEG Source Imaging for Localizing Epileptogenic Zones in Secondary Generalized Epilepsy
Source: Springer Nature journal article supplement (doi:10.1007/s10548-011-0173-2), 2011-03-03
Supplement: MOESM1 [file 10548_2011_173_MOESM1_ESM.pdf]

## Supplementary Figures

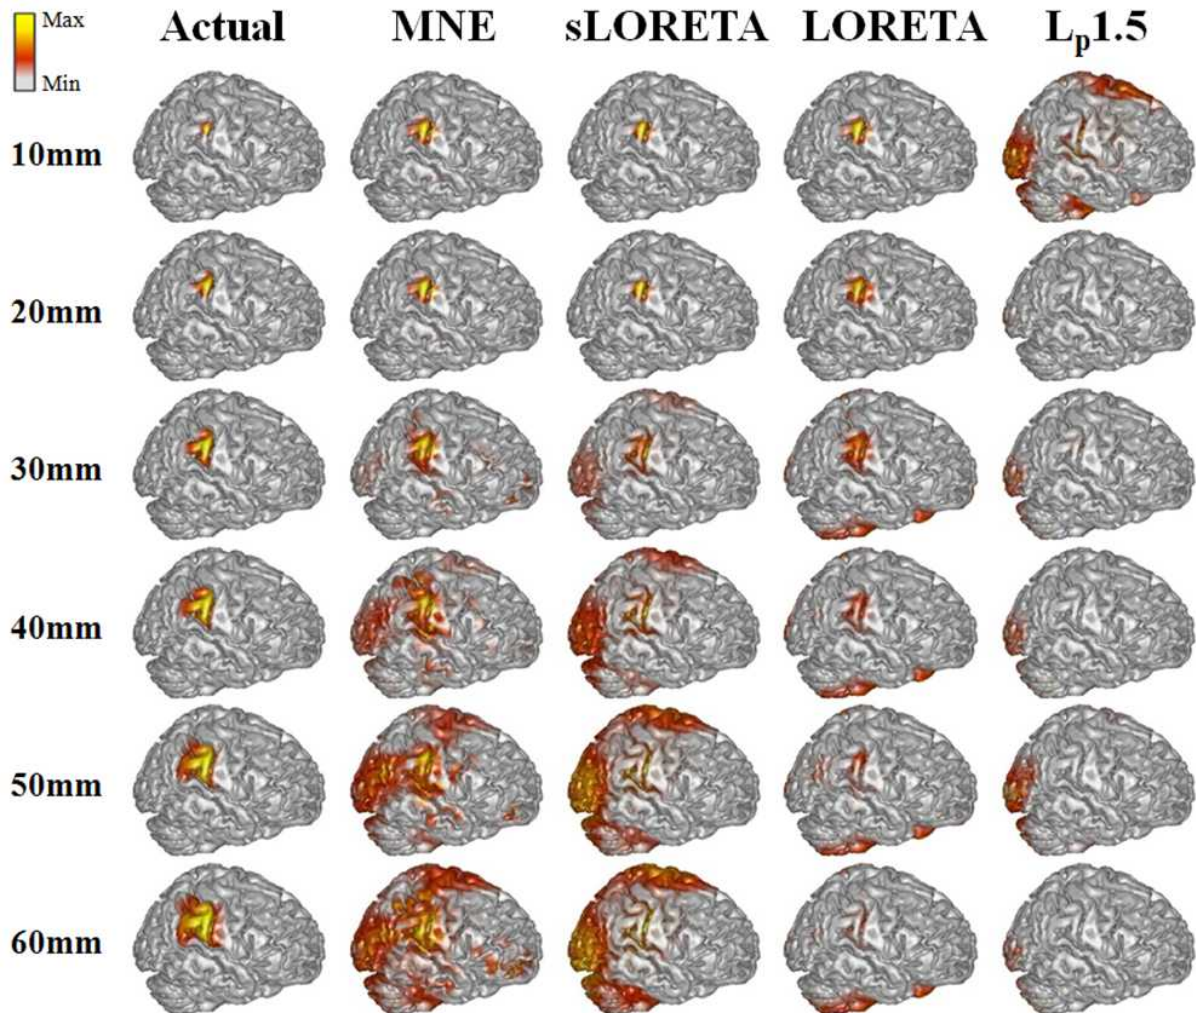

Figure S1. Source estimates when a single source patch was placed in the inferior parietal lobule (below the subdural grid; Case II). The first column shows the actual simulated sources with various patch sizes. The other four columns show the source imaging results reconstructed using four different cortical source imaging algorithms – MNE, sLORETA, LORETA, and L<sub>p</sub>1.5, respectively. All results were normalized to each maximum and displayed with a threshold of 10%. The above explanations are valid for all results depicted in Figures S1 - S5.

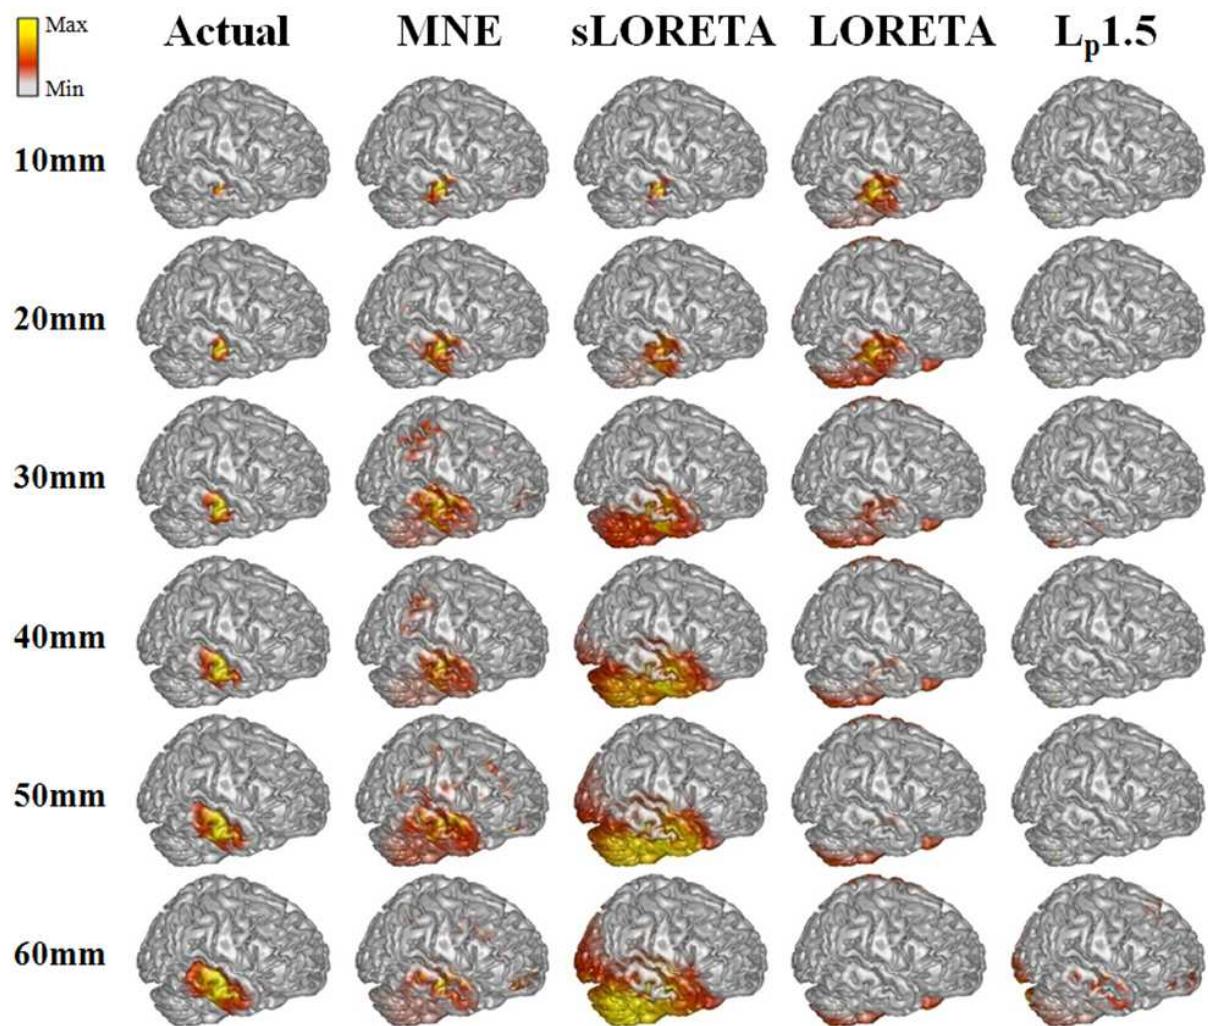

Figure S2. Source estimates when a single source patch was placed in the inferior temporal gyrus (below the subdural grid; Case III). Please refer to the caption of Figure S1.

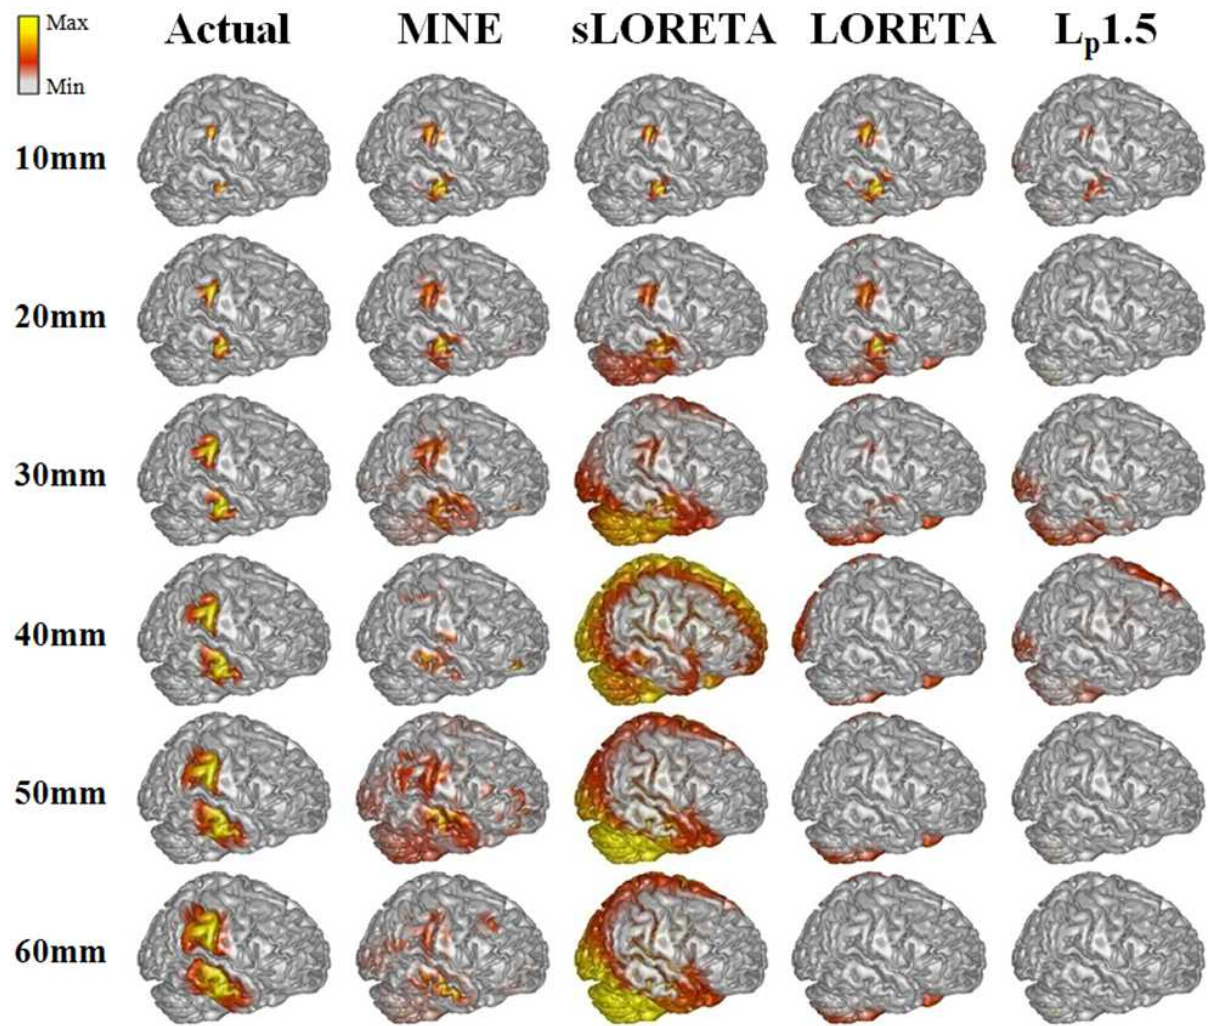

Figure S3. Source estimates when two source patches were placed at source locations 2 and 3 (both below the grid; Case VII). Please refer to the caption of Figure S1.

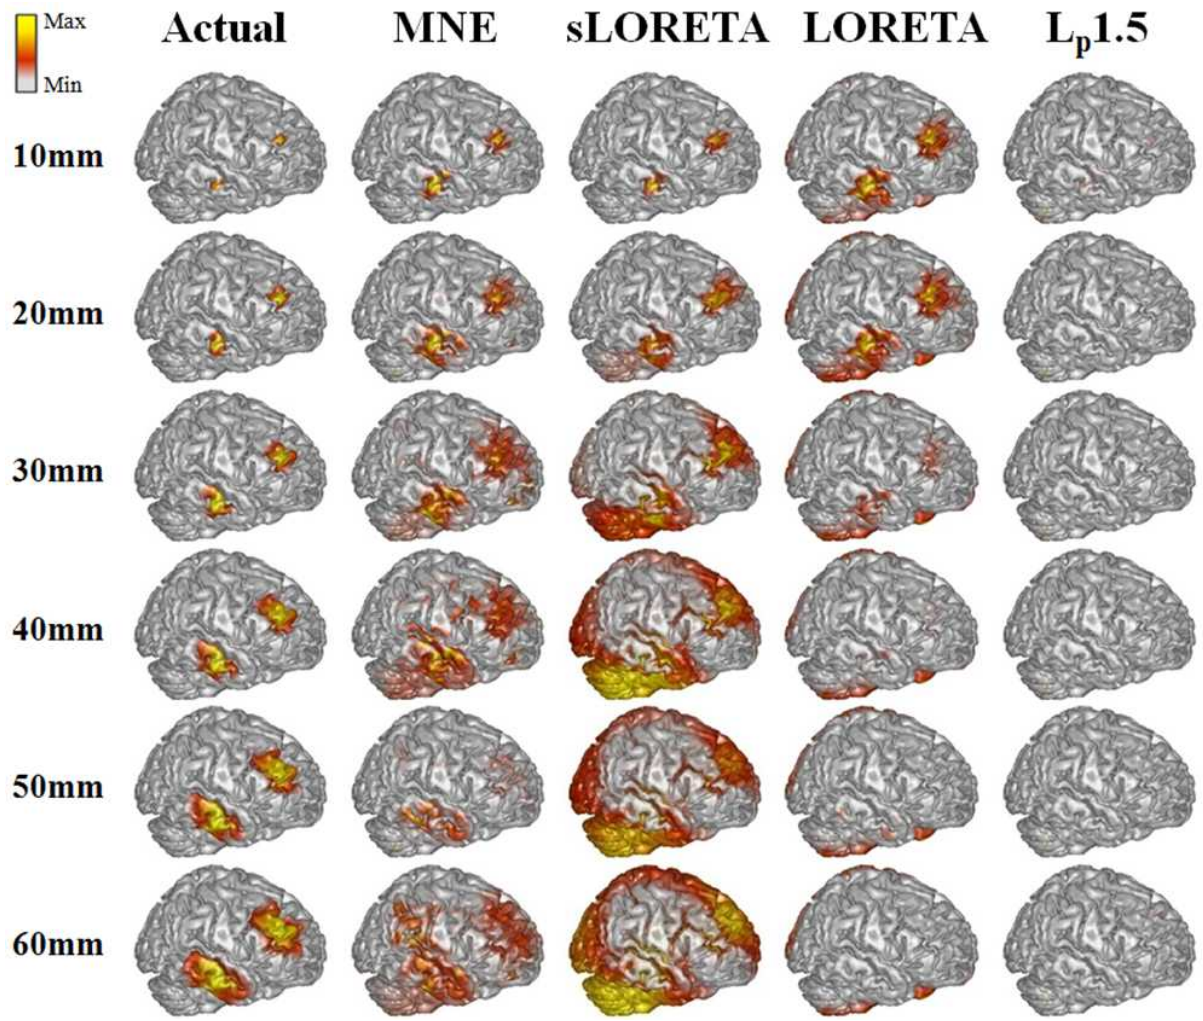

Figure S4. Source estimates when two source patches were placed at source locations 1 and 3 (both below the grid; Case VIII). Please refer to the caption of Figure S1.

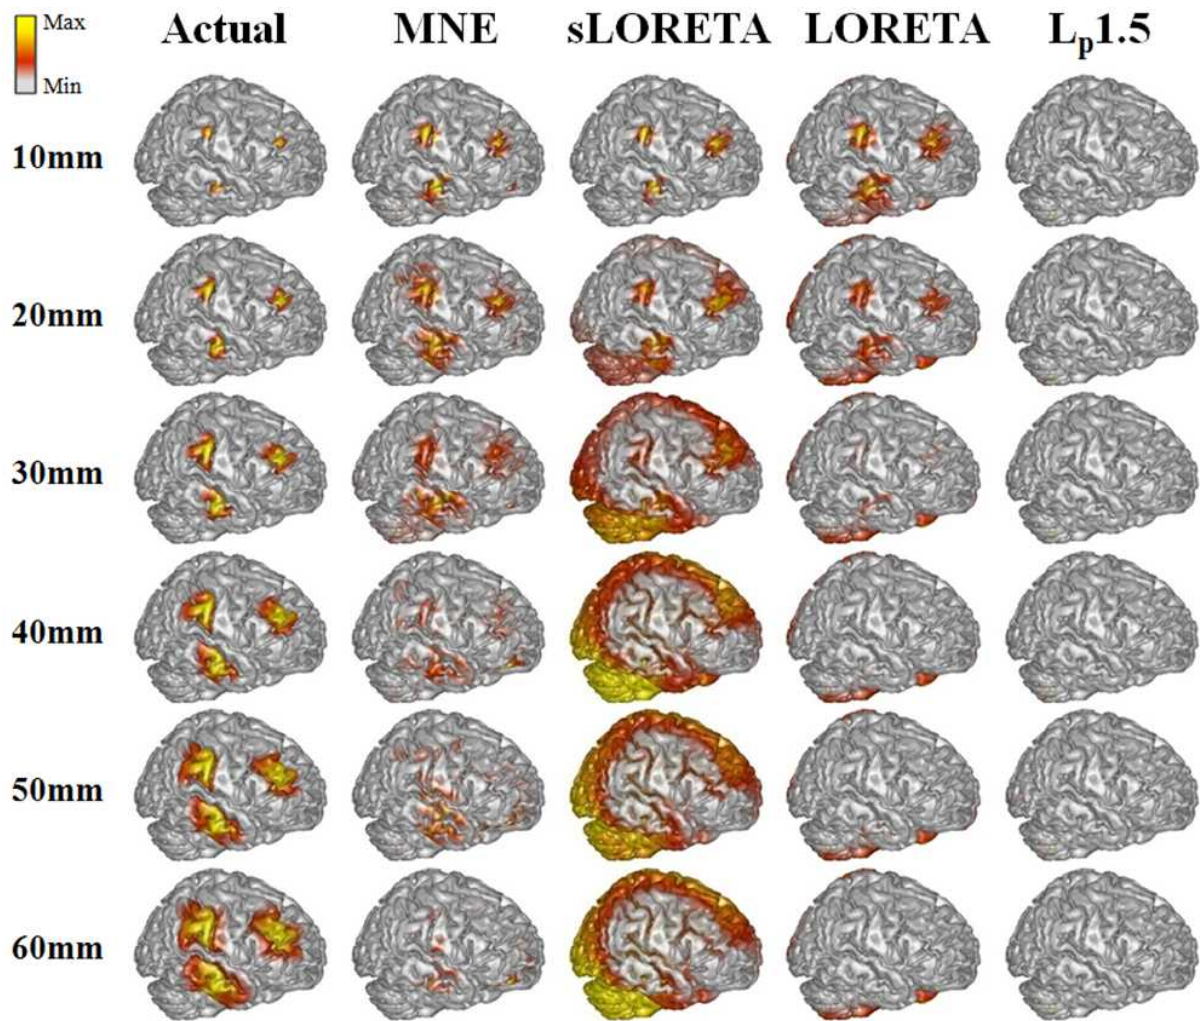

Figure S5. Source estimates when three source patches were placed at source locations 1, 2, and 3 (all below the grid; Case IX). Please refer to the caption of Figure S1.
